# Supplementary material
Source: PubMed Central journal article supplement (PMC2431018)
Supplement: jbc_M707108200_1.pdf [file jbc_M707108200_1.pdf]

Supplemental Figure S1. **cSP5 does not interact with Wnt3a.** Wells in a 96-well plate were coated with either 1  $\mu\text{g}$  of A $\beta$ 40, 0.4  $\mu\text{g}$  of anti-Wnt3a, 200  $\mu\text{l}$  of Wnt3a conditioned medium or 200  $\mu\text{l}$  of conditioned medium from mock-transfected cells (as indicated in the figure), blocked with 1% BSA and incubated with 1  $\mu\text{g}$  of biotinylated cSP5 (bcSP5), 1  $\mu\text{g}$  of biotinylated SQI (bSQI), 100  $\mu\text{l}$  of Wnt3a conditioned medium or 100  $\mu\text{l}$  of conditioned medium from mock-transfected cells. After washing, binding was evaluated using streptavidin-conjugated horseradish peroxidase or with anti-Wnt3a antibody. The blot illustrates one of two independent experiments, revealing that bcSP5 specifically binds to A $\beta$ 40 but not to Wnt3a.

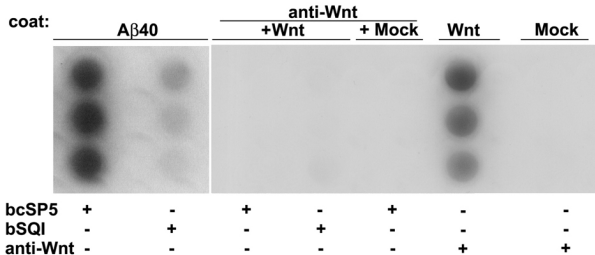

Magdesian et al., Supplemental figure S1
